# Supplementary material for: Ocean-driven millennial-scale variability of the Eurasian ice sheet during the last glacial period simulated with a hybrid ice-sheet–shelf model
Source: Copernicus journal article supplement (doi:10.5194/cp-15-957-2019), 2019-06-04
Supplement: Supplementary file 2 [file cp-15-957-2019-supplement.zip]

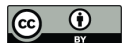

## *Supplement of*

# **Ocean-driven millennial-scale variability of the Eurasian ice sheet during the last glacial period simulated with a hybrid ice-sheet–shelf model**

**Jorge Alvarez-Solas et al.**

*Correspondence to:* Jorge Alvarez-Solas ([jorge.alvarez.solas@fis.ucm.es](mailto:jorge.alvarez.solas@fis.ucm.es))

- [cp-15-957-2019-supplement-title-page.pdf](#)
- [supinfo\\_finalround](#)
  - [SupInfo\\_Eurasian2019\\_finalround.pdf](#)
  - [all\\_srf.mp4](#)
  - [all\\_sub.mp4](#)
  - [atm.mp4](#)

The copyright of individual parts of the supplement might differ from the CC BY 4.0 License.
